# Supplementary material for: Obesity triggers tumoral senescence and renders poorly immunogenic malignancies amenable to senolysis
Source: PubMed Central journal article supplement — Proc Natl Acad Sci U S A. 2022 Dec 27;120(1):e2209973120. doi: 10.1073/pnas.2209973120 (PMC9910606; doi:10.1073/pnas.2209973120), 2022-12-27
Supplement: pnas.2209973120.sapp.pdf [file pnas.2209973120.sapp.pdf]

## SUPPORTING INFORMATION (SI)

### Obesity triggers tumoral senescence and renders poorly immunogenic malignancies amenable to senolysis

**Authors:** Frédéric Fournier<sup>a</sup>, Roberto Diaz-Marin<sup>a</sup>, Frédérique Pilon<sup>b</sup>, Mathieu Neault<sup>a</sup>, Rachel Juneau<sup>b</sup>, Gabrielle Girouard<sup>c</sup>, Ariel M. Wilson<sup>b</sup>, Bruno Larrivée<sup>b</sup>, Frédérick A. Mallette<sup>a,d</sup>, Sergio Crespo-Garcia<sup>a,1,2</sup>, Przemyslaw Sapieha<sup>a,b,e,2</sup>

**Affiliations:**

<sup>a</sup>Department of Biochemistry, Maisonneuve-Rosemont Hospital Research Centre, Université de Montréal, Montréal, Québec, H1T 2M4, Canada

<sup>b</sup>Department of Ophthalmology, Maisonneuve-Rosemont Hospital Research Centre, Université de Montréal, Montréal, Québec, H1T 2M4, Canada

<sup>c</sup>Department of Biomedical Sciences, Maisonneuve-Rosemont Hospital Research Centre, Université de Montréal, Montréal, Québec, H1T 2M4, Canada

<sup>d</sup>Department of Medicine, Maisonneuve-Rosemont Hospital Research Centre, Université de Montréal, Montréal, Québec, H1T 2M4, Canada

<sup>e</sup>UNITY Biotechnology, 285 E Grand Ave, South San Francisco (CA), 94080, USA.

<sup>1</sup>*Present address:* École d'optométrie, Université de Montréal, Québec, H3T 1P1, Canada.

<sup>2</sup>To whom correspondence may be addressed

**Contact:** Przemyslaw (Mike) Sapieha, Ph.D.  
e-mail: [mike.sapieha@umontreal.ca](mailto:mike.sapieha@umontreal.ca)

or Sergio Crespo-Garcia, Ph.D.  
e-mail: [sergio.crespo.garcia@umontreal.ca](mailto:sergio.crespo.garcia@umontreal.ca)

Maisonneuve-Rosemont Hospital Research Centre  
5415 Assomption Boulevard, Montreal, QC, H1T 2M4, Canada

TEL: (514) 252-3400 ext. 7711. FAX: (514) 252-3430

Supplementary Figures

Figure S1

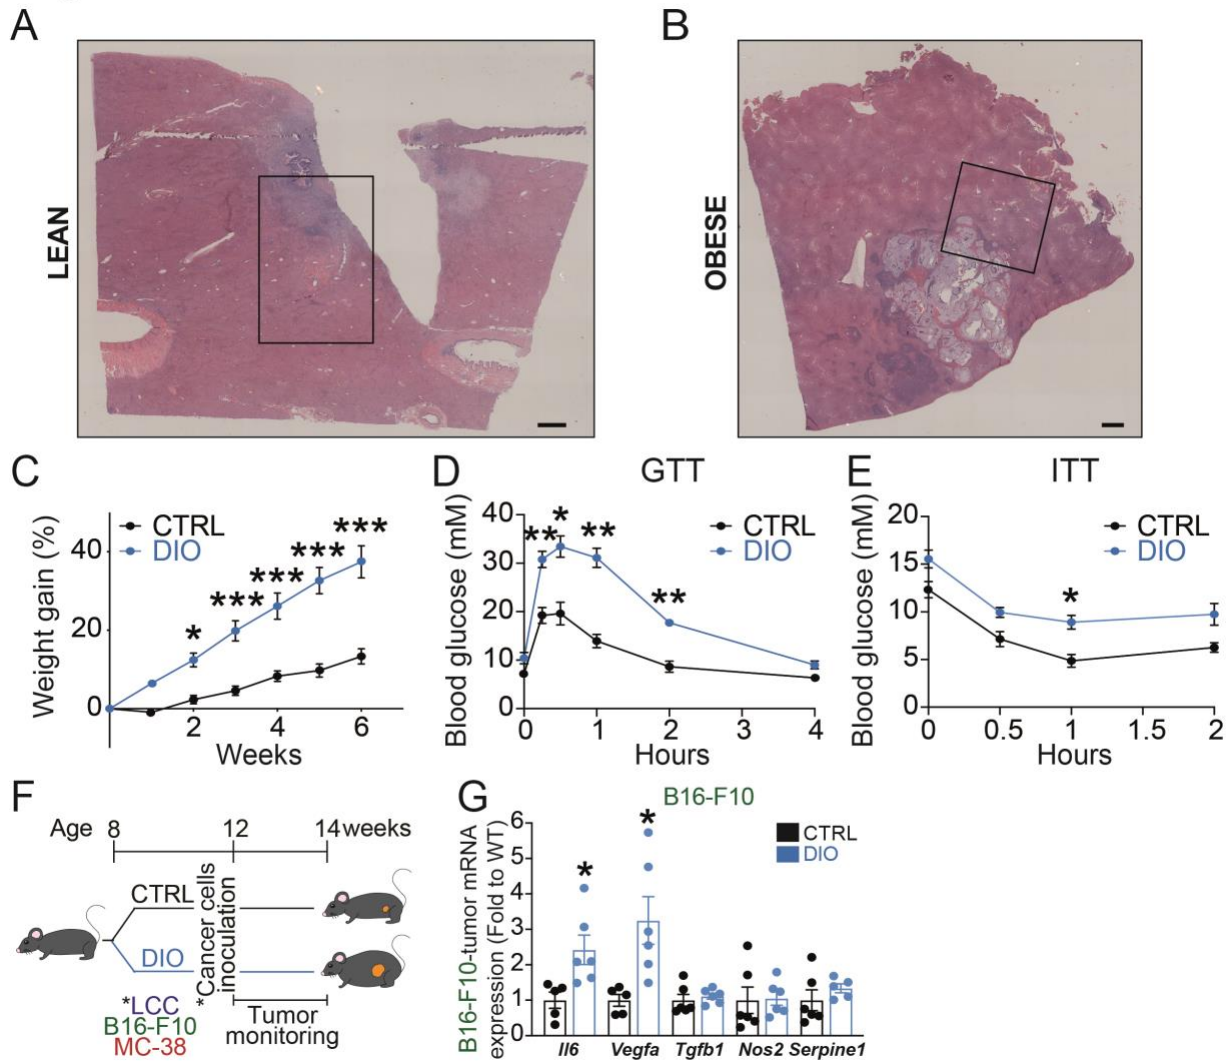

Supplementary Figure S1. Related to Figure 1, diet-induced obesity potentiates tumor growth and triggers tumoral senescence in poorly immunogenic tumors

(A-B) Images shows H&E staining of human (A) lean and (B) obese samples used to represent immunofluorescence stainings in Figure 1A. Black squares represent regions from which depicted images were taken. (C) Weight gain curve represented as percentage of weight gain. (D) GTT of mice under DIO for 4 weeks and (E) ITT of animals under DIO for 5 weeks. (F) Schematic representation of the experimental paradigm combining diet-induced obesity with

LLC, B16-F10, and MC-38 cells syngeneic injections. (G) Bar charts represent analysis of SASP-related factors using mRNA expression of *Il6*, *Vegfa*, *Tgfb1*, *Nos2*, and *Serpine1* in whole B16-F10-tumor lysates.

*In vivo* data represent  $\geq 2$  independent experiments with  $n \geq 5$  biological replicates.

Statistics: (C-E) Two-way ANOVA and Bonferroni post-hoc test. (G) Two-tailed unpaired Student's *t* test. \*  $P < 0.05$ , \*\*  $P < 0.01$ , \*\*\*  $P < 0.001$ ; 95% CI. Error bars represent the mean  $\pm$  SEM. Each *n* represents one biological replicate.

Figure S2

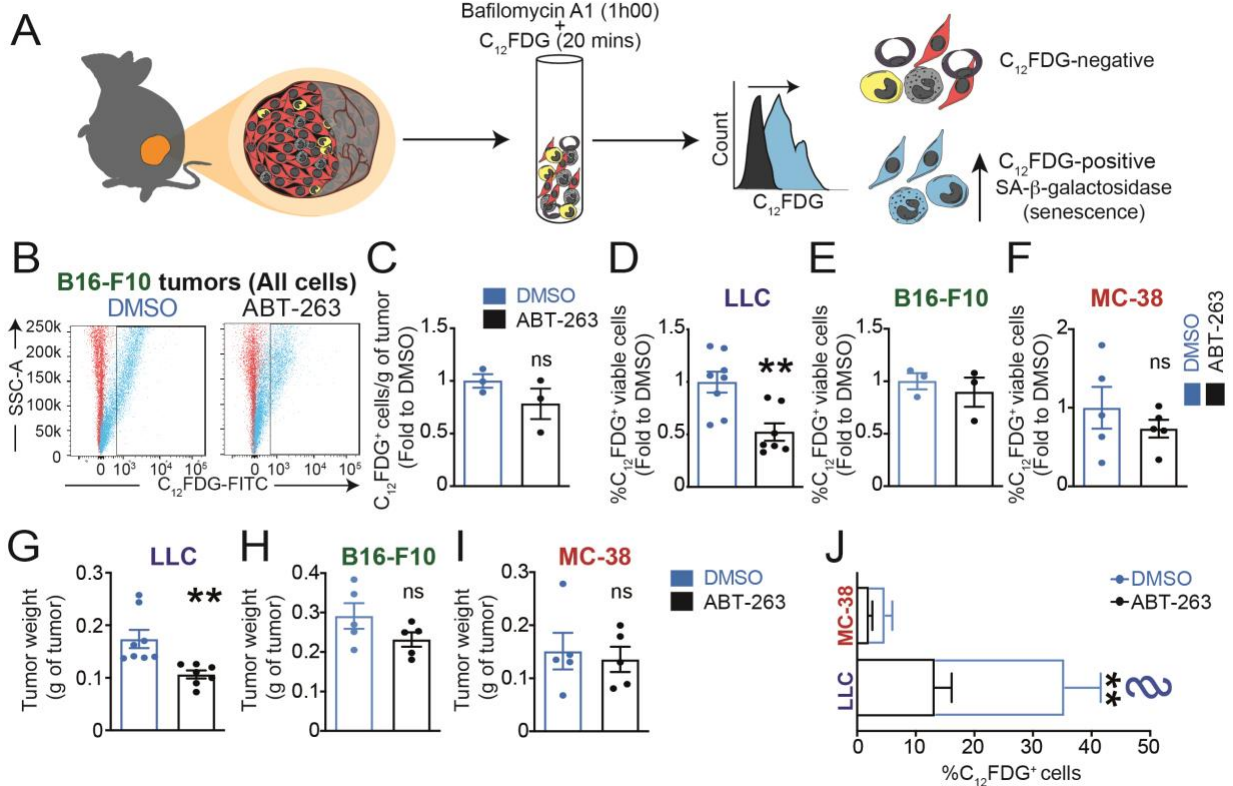

Supplementary Figure S2. Related to Figure 2, therapeutic senolysis hinders obesity-driven tumor growth

(A) Schematic representation of the experimental strategy for the detection of SA-β-Gal activity at the single cell level using C<sub>12</sub>FDG. (B-C) Representative (B) FACS histograms and (C) quantification of C<sub>12</sub>FDG<sup>+</sup> cells in B16-F10 tumors from DMSO- or ABT-treated mice. Bar charts indicate the relative number of C<sub>12</sub>FDG<sup>+</sup> cells per gram of tumor. (D-F) FACS quantification of C<sub>12</sub>FDG<sup>+</sup> viable (D) LLC, (E) B16-F10 or (F) MC-38 cells in whole tumors. Bar charts indicate the relative number of C<sub>12</sub>FDG<sup>+</sup> cells to total cells. (G-I) Bar charts indicate (G) LLC, (H) B16-F10, and (I) MC-38 tumors from DMSO- or ABT-treated mice. (J) Bar charts indicate the relative proportion of C<sub>12</sub>FDG<sup>+</sup> cells in poorly immunogenic LLC or highly immunogenic MC-38 tumors after treatment or controls. § compares DMSO groups and \* compares ABT-263 groups.

Data represent  $\geq 2$  independent experiments with  $\geq 5$  biological replicates.

Statistics: (C-J) Two-tailed unpaired Student's  $t$  test. \*P <0.05, \*\*P <0.01, \*\*\*P <0.001. Error bars represent the mean  $\pm$  SEM. Each  $n$  represents one biological replicate

Figure S3

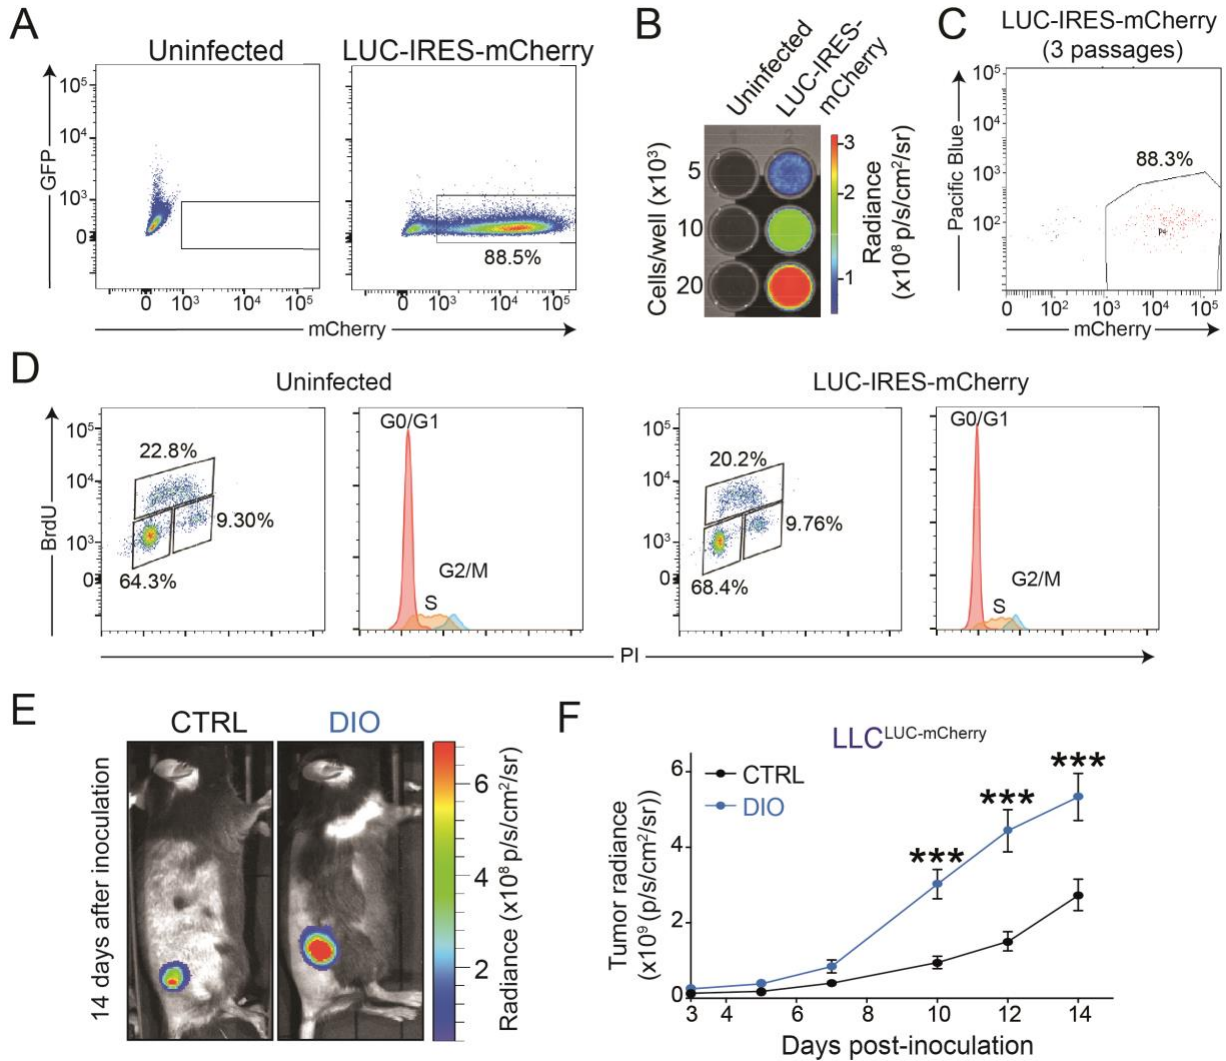

Supplementary Figure S3. Related to Figure 3, senolysis targets SA- $\beta$ gal<sup>+</sup> cancer cells in obese mice to limit tumor growth

(A) Illustrative histogram showing the population of mCherry<sup>+</sup> cells following LLC cells transduction with the MSCV-LUC-IRES-mCherry plasmid. (B) Luciferase activity of mCherry<sup>+</sup> LLC cells (LUC-IRES-mCherry cells) is dependent on the cell concentration *in vitro*. (C) Illustrative histogram showing the population of LUC-IRES-mCherry LLC cells *in vitro* following transduction. Percentage indicates proportion of mCherry<sup>+</sup> LLC cells on total LLC cells (D) Illustrative histograms depicting the cell cycle state of uninfected LLC cells

compared to LUC-IRES-mCherry LLC cells using PI and BrdU. Percentages indicate proportions of LLC cells in each cell cycle phase to total LLC cells. **(E)** Representative images of tumors *in vivo* from mice under DIO or CTRL diet at 14-days post-inoculation of LLC<sup>LUC-mCherry</sup> cells obtained with *IVIS*. Images overlay the luminescent signals and are represented as radiance (p/s/cm<sup>2</sup>/sr). Imaging thresholds were optimized for minimizing inter-batch variation (min: 3.85e7; max:6.90e8). **(F)** Curve represents the tumor growth of LLC<sup>LUC-mCherry</sup> cells in mice under DIO or CTRL diet monitored with *IVIS*.

*In vivo* data represent  $\geq 2$  independent experiments with  $n \geq 5$  biological replicates.

Statistics: **(F)** Two-way ANOVA \*P <0.05, \*\*P <0.01, \*\*\*P <0.001. Error bars represent the mean  $\pm$  SEM. Each  $n$  represents one biological replicate.



Figure S4

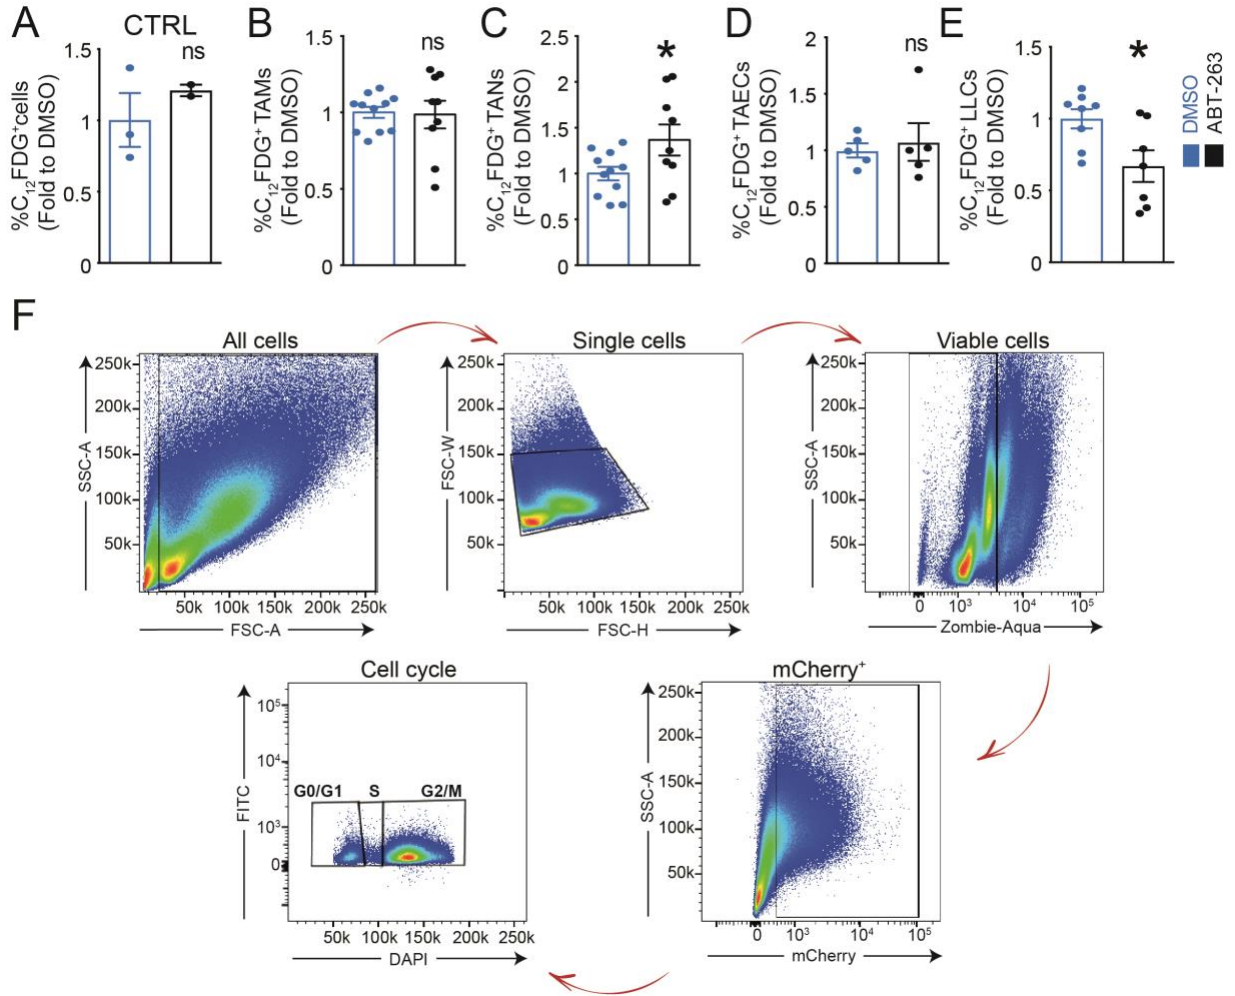

**Supplementary Figure S4. Related to Figure 4, ABT-263 eliminates growth-arrested cancer cells in poorly immunogenic tumors during DIO**

(A) FACS quantification of all cells in Ctrl mice inoculated with LLC cells. Bar charts indicate the relative percentage of  $C_{12}FDG^+$  cells on DMSO. (B-E) FACS quantification of  $C_{12}FDG^+$  (B) TAMs, (C) TANs, (D) TAECs, and (E) LLCs cells in whole tumors. Bar charts indicate the relative number of  $C_{12}FDG^+$  cells to total cells. (F) Gating strategy used to analyze the cell cycle status of viable LLC cells in tumors.

FACS data represent more than 1 independent experiment with  $\geq 2$  biological replicates.

(A-E) Two-tailed unpaired Student's *t* test. \**P* < 0.05, \*\**P* < 0.01, \*\*\**P* < 0.001. Error bars represent the mean  $\pm$  SEM. Each *n* represents one biological replicate.

## ARRIVE guidelines for animal research

### Essential 10

#### 1. Study design

1a. **Groups compared:** Our study uses the combination of two experimental models: A diet-induced obesity model (DIO) and a syngeneic tumor inoculation model. We fed 8-week-old C57Bl/6 WT mice with either a HFD (DIO) or a nutritionally matched RD (CTRL) for 6 weeks. After 4 weeks of diet, we inoculated LLC, B16-F10 and MC-38 cells via syngeneic injections and monitored tumor growth every second day for 2 weeks. We also orally administered ABT-263 to the animals for 5 consecutive days (from D7 to D11 post tumor inoculation). The dosage was of 75mg/kg/day and the control is DMSO (vehicle). For each *in vivo* experiments, tumors and other relevant tissues were dissected 14 days after tumor inoculations. Diagrams representing our experimental paradigms can be found in **Supplementary Figure S1, S2 and Figure 2**.

1b. **Experimental unit:** Each experimental unit (n) is typically an animal, or a tumor from an animal. Regarding the single cell analysis, the experimental unit is all the sorted cells from one tumor. When the number of cells of a sorted cell type in one tumor is low, we pooled multiple tumors together. The experimental unit is then the pooled cells from 2 or more tumors. The specific nature of the experimental unit is always specified in the figure legends.

#### 2. Sample size

2a. **The exact number of experimental units:** The exact number of animals used might differ from the total experimental units showed in the figures following the respect of our inclusion/exclusion criteria (See next section). **Supplementary Table S5** recapitulates all experimental units and animal numbers for each *in vivo* experiments of our study.

2b. **Rationale behind sample size:** The sample size of each experiment was based on previous experiments and existing literature references. 4 to 17 biological replicates per group were used for *in vivo* studies, as indicated in **Supplementary Table S5**.

### 3. Inclusion and exclusion criteria

#### 3a. Criteria

**Tumor ulceration:** An experimental unit or an animal is excluded from the experiment when the tumor shows signs of an important ulceration. In addition to causing unnecessary pain to the animal, tumor ulceration affects the integrity of the tumor micro-environment and is therefore considered as an exclusion criterion.

**Mouse reaches limit points:** All animals used in our study were treated in agreement with the Animal Care Committee of the Maisonneuve-Rosemont Hospital Research Center and following the guidelines established by the Canadian Council on Animal Care. All animals that would reach the limit points of our animal protocol (e.g. tumor ulceration, >20% weight loss, tumor volume that is exceeding 1.5cm<sup>3</sup>) would be euthanized and excluded from our study.

3b. All excluded units have not been considered in the statistical analysis and are presented in **Supplementary Table S5**.

3c. The exact values of n for all experiments of our study are shown in **Supplementary Table S5** and in the **Figure section**.

### 4. Randomization

4a. **Randomization method:** Animals were randomized using the online GraphPad Prism random number generator. However, for the sake of space at our animal facility, mice were kept in the least cage possible. Thus, small modifications to the randomization were done with respect to the space constraints. Also, ABT-263 treated mice (vs DMSO vehicle) were determined before tumor inoculation by another investigator to avoid biases.

4b. **Strategy to minimize potential confounders:** All tumor inoculations and tumor monitoring measurements were done by the same person. Tumor inoculations were performed blindly. All animal cages were always kept on the same lanes on the experimental rack in the animal facility, but cages were moved among that lane at every tumor monitoring day (every second day). All tumor monitoring handling and animal dissections were performed in the morning by the same investigators (7h00-10h00).

## 5. Blinding

Tumor inoculations were performed blindly. One investigator put the animals to sleep, while the other injected the cancer cells subcutaneously without knowing about the animal diet, genetic background or treatment (ABT-263 or DMSO). During tumor monitoring, the principal investigator knew which group was assessed in which order. Concerning the senolytic experiment, animals receiving the treatment were determined prior to tumor inoculation in a randomized fashion and the investigator treating mice by gavage became aware of the dedicated group of each mouse at the moment of the first treatment. The outcome analysis was always confirmed by at least a second independent investigator, and data analysis were confirmed or performed by a different investigator (third party) to avoid bias.

## 6. Outcome measures

6a. **Outcome measure assessed:** The outcome measures are always specified in figure legends to allow total transparency. Here is the outcome measures justifications for the *in vivo* experiments. All *ex vivo* outcome measures are also clearly specified in the Figure legends section.

- Tumor monitoring units: volumetric measurements (length and width) and radiance measures (p/s/cm<sup>2</sup>/sr) were employed to evaluate tumor volume at each time point. We used two complementary assessments to overcome possible biases and/or artefacts, such as skin color, tumor depth, cell types heterogeneity, tissue fibrosis, etc. Bioluminescent signal from cancer cells were showed as radiance to illustrate the photon emission intensity from an animal per second, as opposed to a total count of photon incident on a detector.
- Weight gain units: We are showing percentage of weight gain through time. This outcome measure considers the initial weight of each animal on the average weight gain of each group.

6b. **Primary outcome measure:** This work does not primarily focus on a therapy efficiency or the impact of a given treatment on a phenotype. Our hypothesis was not only verified via therapeutical *in vivo* experiments. Several outcome measures were considered and explicitly described in the Methods and Figure legends sections.

## 7. Statistical methods

7a. **Statistical methods details:** All the statistical methods that were used are mentioned and explained in the appropriate section of the Figure legends. Every graph illustrates the mean value  $\pm$  the standard error of mean (Mean  $\pm$  SEM) and each symbol on the graphs represent one experimental unit. The choice of the statistical analysis took into consideration the number of groups and the number of variables that are compared within one single analysis. When necessary, our data was normalized on a housekeeping gene and on the control group (RD-WT). Further information regarding data normalization is mentioned in the Figure legends section.

7b. **Methods used to assess whether the data met the assumption of the statistical approach:** We did not use any test for normality or performed any data transformation. All included experimental units (see **Supplementary Table S5**) were plotted on graphs and represented as a symbol to show biological variability among groups and parametric analysis were performed to assess whether difference observed were biologically relevant and significant.

## 8. Experimental animals

8a & b. **Animals appropriate details:** Details about experimental animals and cell lines that were either used or produced for this article are exhaustively described in the Methods section. In brief, the cancer cell lines cultured and inoculated were the Lewis Lung Carcinoma cell line LLC1 (referred in this paper as LLC), the B16-F10 melanoma cell line and the MC-38 colorectal cell line. We generated an LLC transgene expressing the mCherry and the Luciferase protein reporters, which allowed us to follow LLC cells both *in vivo* and *ex vivo* using their fluorescent and bioluminescent properties. C57BL/6J WT mice were purchased from the Jackson Laboratory and bred in house. 8-week-old male mice were put under a HFD (DIO) or a control nutritionally matched RD (CTRL) for 4 weeks prior to tumor inoculation.

## 9. Experimental procedures

9a. **What was done, how it was done and what was used?** Experimental paradigms are exhaustively described in the Methods section and schematics representing the experimental timeline are available in the paper figures.

9b. **When and how often?** All strains were kept in 12h-12h light & dark cycles with free access to water and food. All the *in vivo* tumor monitoring experiments and animal sacrifices/terminal surgical interventions were performed in the morning (7am-10am). All weight measurements were done once a week in the afternoon (1pm-4pm).

9c. **Where?** All animals' procedures were performed by the same investigators in the same dedicated space within the animal facility. All the procedures were done at the same site for all the animals involved in this study.

9d. **Why?** Rationale for the different procedures is described in the Methods section.

## 10. Results

10a. **Summary descriptive statistics for each experimental group:** See **Supplementary Table S5** and section 7 for a summary descriptive. The Figure legends section also presents an exhaustive summary of all experimental units and statistics used for each experiment.

10b. **Effect size with a confidence interval:** All analysis performed, with a statistically significant result or not, are reported in the Figure section along with the experimental units that were used for each one of them so that the reader can appreciate the attention we put on biological relevance (See also **Supplementary Table S5**). Moreover, every experimental unit is shown and represented as a symbol on the graphs. In sum, although we did not strictly perform effect size calculations, we always took into consideration the biological relevance of an experimental change by considering fold change between groups and confidence intervals.

## SUPPLEMENTARY TABLES

**Supplementary Table S1. Clinical data of tumors analyzed in the study**

| PATIENT  | BMI  | SEX | AGE | RUBBIA<br>BRANDT | BLAZER  | # LESIONS | TUMOR<br>(cm) |
|----------|------|-----|-----|------------------|---------|-----------|---------------|
| LEAN 1   | 18.9 | M   | 65  | 4                | minor   | 1         | 3.2           |
| LEAN 2   | 15.7 | M   | 56  | 3                | major   | 1         | 2.5           |
| LEAN 3*  | 18.2 | F   | 64  | 3                | major   | 2         | 0.6           |
| OBESE 1  | 39.7 | M   | 62  | no data          | no data | 1         | 5.0           |
| OBESE 2* | 45.6 | F   | 68  | 4                | minor   | 1         | 1.5           |
| OBESE 3  | 35.1 | M   | 67  | 4                | minor   | 3         | 2.5           |

**Supplementary Table S2. Primary antibodies**

| ANTIBODY                 | METHOD | CLONE | SPECIE              | DILUTION                        | SOURCE          | CAT#     |
|--------------------------|--------|-------|---------------------|---------------------------------|-----------------|----------|
| BrdU (APC)               | FACS   | Bu20a | Mouse               | Titration by lot                | Biolegend       | 339807   |
| $\beta$ -ACTIN           | WB     | N/A   | Mouse               | 1:5000                          | Cell Signalling | 3700S    |
| BCL-2                    | WB     | N/A   | Rabbit              | 1:1000                          | Abcam           | ab182858 |
| BCL-w                    | WB     | N/A   | Goat                | 1:1000                          | R&D Systems     | AF8241   |
| BCL-xL                   | WB     | N/A   | Rabbit              | 1:1000                          | Cell Signalling | 2764S    |
| C <sub>12</sub> FDG-FITC | FACS   | N/A   | N/A                 | 2mM                             | Invitrogen      | D2893    |
| CD11B (BV711)            | FACS   | M1/70 | Rat                 | Titration by lot                | Biolegend       | 101242   |
| CD11C (BV786)            | FACS   | N418  | Armenian<br>Hasmter | Titration by lot                | Biolegend       | 117335   |
| Caspase3                 | WB     | N/A   | Rabbit              | 1:1000                          | Cell Signaling  | 9662S    |
| CD16/32 (Fc Block)       | FACS   | 93    | Rat                 | 1 $\mu$ L/10 <sup>6</sup> cells | Biolegend       | 101330   |

|                          |      |               |        |                     |               |            |
|--------------------------|------|---------------|--------|---------------------|---------------|------------|
| CD31 (APC)               | FACS | MEC<br>13.3   | Rat    | Titration by<br>lot | BD Pharmingen | 551262     |
| CD45.2 (AlexaFluor700)   | FACS | 104           | Mouse  | Titration by<br>lot | Biolegend     | 109822     |
| CD64 (APC)               | FACS | X54-<br>5/7.1 | Mouse  | Titration by<br>lot | Biolgend      | 139305     |
| F4/80 (PE/Cy7)           | FACS | BM8           | Rat    | Titration by<br>lot | Biolegend     | 123114     |
| F4/80                    | IF   | BM8           | Rat    | 1:300               | Invitrogen    | 14-4801-82 |
| IgG2 <sub>ak</sub> (APC) | FACS | N/A           | Rat    | Titration by<br>lot | BD Pharmingen | 553932     |
| Ly-6G (APC/Cy7)          | FACS | 1A8           | Rat    | Titration by<br>lot | Biolegend     | 127624     |
| p16 <sup>INK4A</sup>     | WB   | N/A           | Rabbit | 1:500               | Abcam         | ab211542   |
| p16 <sup>INK4A</sup>     | IF   | N/A           | Rat    | 1:100               | Abcam         | ab241543   |
| p21 <sup>CIP1</sup>      | WB   | N/A           | Rabbit | 1:2000              | Abcam         | ab109199   |
| PAI-1                    | IF   | N/A           | Mouse  | 1:100               | Santa Cruz    | sc-5297    |
| PAI-1                    | WB   | N/A           | Mouse  | 1:500               | Santa Cruz    | sc-5297    |



**Supplementary Table S3. Primer sequences**

| <i>Gene</i>      | Primer sequence |                          |
|------------------|-----------------|--------------------------|
| <i>mActb</i>     | Forward         | GACGGCCAGGTCATCACTATTG   |
|                  | Reverse         | CCACAGGATTCCATACCCAAGA   |
| <i>mIl6</i>      | Forward         | CTTCCATCCAGTTGCCTTC      |
|                  | Reverse         | ATTTCCACGATTTCCAGAG      |
| <i>mNos2</i>     | Forward         | CGGCAAACATGACTTCAGGC     |
|                  | Reverse         | GCACATCAAAGCGGCCATAG     |
| <i>mSerpine1</i> | Forward         | TGACGTCGTGGAAGTGC        |
|                  | Reverse         | GAAAGACTTGTGAAGTCGGC     |
| <i>mTgfb1</i>    | Forward         | ACGCCTGAGTGGCTGTCTTTTGAC |
|                  | Reverse         | GGGCTGATCCCGTTGATTTCCACG |
| <i>mVegfa</i>    | Forward         | GCCCTGAGTCAAGAGGACAG     |
|                  | Reverse         | CTCCTAGGCCCTCAGAAGT      |

**Supplementary Table S4. Key resources related to the Methods**

| REAGENT or RESOURCE                                  | SOURCE                                      | IDENTIFIER       |
|------------------------------------------------------|---------------------------------------------|------------------|
| <b>Bacterial and Virus Strains</b>                   |                                             |                  |
| Gamma-retrovirus                                     | Neault M <i>et al.</i> , Cell Reports, 2016 | N/A              |
| <b>Chemicals, Peptides, and Recombinant Proteins</b> |                                             |                  |
| ABT-263                                              | Selleckchem.com                             | Cat# S1001       |
| Bafilomycin A1                                       | Sigma Aldrich                               | Cat# B1793       |
| BrdU                                                 | Abcam                                       | Cat# ab142567    |
| C <sub>12</sub> FDG (FITC)                           | Invitrogen                                  | Cat# D2893       |
| Collagenase IV                                       | Worthington                                 | Cat# LS004188    |
| DAPI                                                 | Sigma Aldrich                               | Cat# D9542       |
| D-Luciferine potassium salt                          | Perkin Elmer                                | Cat# 122799      |
| DNaseI                                               | Sigma Aldrich                               | Cat# D4527       |
| Hexadimethrine bromide                               | Sigma Aldrich                               | Cat#107689       |
| HumulinR (Insulin)                                   | Lilly                                       | Cat# DIN00586714 |
| Liberase TL                                          | Sigma Aldrich                               | Cat#540120001    |
| Lipofectamine® 2000                                  | Invitrogen                                  | Cat# 11-668-019  |
| Phosphatase inhibitor                                | Sigma Aldrich                               | Cat# P5726       |
| 2-Propanol                                           | Sigma Aldrich                               | Cat# 650447      |
| Propidium Iodide                                     | Sigma Aldrich                               | Cat# P4864-10mL  |
| Protease inhibitor                                   | Sigma Aldrich                               | Cat# P8340       |
| RBC Lysis Buffer                                     | Invitrogen                                  | Cat# 00-4333057  |
| UltraComp eBeads                                     | Invitrogen                                  | Cat# 01-2222-42  |
| X-Gal                                                | BioShop                                     | Cat# XGA00.1     |

|                                                    |                                                                                                                                                    |                                 |
|----------------------------------------------------|----------------------------------------------------------------------------------------------------------------------------------------------------|---------------------------------|
| Xylenes                                            | Sigma Aldrich                                                                                                                                      | Cat# 214736                     |
| Zombie aqua                                        | Biolegend                                                                                                                                          | Cat#423102                      |
| <b>Critical Commercial Assays</b>                  |                                                                                                                                                    |                                 |
| Caspase-Glo® 3/7 Assay System                      | Promega                                                                                                                                            | Cat#G8090                       |
| Cytofix/Cytoperm kit                               | Biosciences                                                                                                                                        | Cat# 554714                     |
| Mouse & rabbit HRP/DAB (ABC) detection IHC kit     | Abcam                                                                                                                                              | ab64264                         |
| QuantiPro BCA Assay Kit                            | Sigma Aldrich                                                                                                                                      | Cat# QBPCA-1KT                  |
| <b>Deposited Data</b>                              |                                                                                                                                                    |                                 |
|                                                    |                                                                                                                                                    |                                 |
| <b>Experimental Models: Cell Lines</b>             |                                                                                                                                                    |                                 |
| B16-F10                                            | ATCC                                                                                                                                               | CRL-6475                        |
| HEK 293T                                           | ATCC                                                                                                                                               | CRL-3216                        |
| Lewis Lung Carcinoma (LLC)                         | ATCC                                                                                                                                               | CRL-1642                        |
| Lewis Lung Carcinoma (LLC <sup>LUC-mCherry</sup> ) | This paper                                                                                                                                         | N/A                             |
| MC-38                                              | ATCC                                                                                                                                               |                                 |
| <b>Experimental Models: Organisms/Strains</b>      |                                                                                                                                                    |                                 |
| Mouse: C57BL/6J (referred as WT)                   | Jackson Laboratories                                                                                                                               | No.000664                       |
| <b>Recombinant DNA</b>                             |                                                                                                                                                    |                                 |
| Plasmid: MSCV-LUC-IRES-mCherry                     | MI-Luciferase-IRES-mCherry was a gift from Xiaping Sun (Addgene plasmid; <a href="http://n2t.net/addgene:75020">http://n2t.net/addgene:75020</a> ) | Cat# 75020; RRID: Addgene_75020 |

|                                      |                                                                                                                                                                                                                                                      |                                |
|--------------------------------------|------------------------------------------------------------------------------------------------------------------------------------------------------------------------------------------------------------------------------------------------------|--------------------------------|
| Plasmid: pCL-ECO                     | pCL-ECO was a gift from Inder Verma (Addgene plasmid # 12371 ; <a href="http://n2t.net/Addgene:12371">http://n2t.net/Addgene:12371</a> )                                                                                                             | Cat#12371; RRID: Addgene_12371 |
| <b>Software and Algorithms</b>       |                                                                                                                                                                                                                                                      |                                |
| Fiji (ImageJ)                        | <a href="https://imagej.net/Fiji">https://imagej.net/Fiji</a>                                                                                                                                                                                        | V1.0                           |
| FlowJo                               | <a href="https://www.flowjo.com/">https://www.flowjo.com/</a>                                                                                                                                                                                        | V10.2                          |
| GraphPad Prism                       | <a href="https://www.graphpad.com/scientific-software/prism/">https://www.graphpad.com/scientific-software/prism/</a>                                                                                                                                | V8.4.3                         |
| Living Image                         | Perkin Elmer ( <a href="https://www.perkinelmer.com/fr/lab-products-and-services/resources/in-vivo-imaging-software-downloads.html">https://www.perkinelmer.com/fr/lab-products-and-services/resources/in-vivo-imaging-software-downloads.html</a> ) | V4.7.3                         |
| <b>Other</b>                         |                                                                                                                                                                                                                                                      |                                |
| AlphaTrak2 blood glucose test strips | Zoetis                                                                                                                                                                                                                                               | Cat# 71681-01                  |
| Mouse diet: High Fat Diet 60% lipids | Research Diet                                                                                                                                                                                                                                        | Cat#D12492                     |
| Mouse diet: Regular Diet 10% lipids  | Research Diet                                                                                                                                                                                                                                        | Cat#D12450J                    |

**Supplementary Table S5. Sample size justification for *in vivo* experiments**

| Figure | Experiment                      | Cancer cell line           | Group/Condition | N  | Total mouse number ( $\Delta$ ) | Exclusion/inclusion criteria                                |                                      |
|--------|---------------------------------|----------------------------|-----------------|----|---------------------------------|-------------------------------------------------------------|--------------------------------------|
| 1C     | Tumor monitoring <i>in vivo</i> | LLC                        | CTRL-WT         | 6  | 6                               | 1. Tumor ulceration<br>2. Mouse reaches limit points (CCPA) |                                      |
|        |                                 |                            | DIO-WT          | 7  | 7                               |                                                             |                                      |
| 1D     | Tumor monitoring <i>in vivo</i> | B16-F10                    | CTRL-WT         | 6  | 6                               |                                                             |                                      |
|        |                                 |                            | DIO-WT          | 5  | 5                               |                                                             |                                      |
| 1E     | Tumor monitoring <i>in vivo</i> | MC38                       | CTRL-WT         | 6  | 6                               |                                                             |                                      |
|        |                                 |                            | DIO-WT          | 6  | 6                               |                                                             |                                      |
| S1C    | Weight gain monitoring          | N/A                        | CTRL-WT         | 10 | 10                              |                                                             | 1. Mouse reaches limit points (CCPA) |
|        |                                 |                            | DIO-WT          | 11 | 11                              |                                                             |                                      |
| S1D-E  | GTT/ITT                         | N/A                        | CTRL-WT         | 5  | 5                               |                                                             | 1. Mouse reaches limit points (CCPA) |
|        |                                 |                            | DIO-WT          | 5  | 5                               |                                                             |                                      |
| 2B     | Tumor monitoring <i>in vivo</i> | LLC                        | DIO-WT-DMSO     | 9  | 9                               | 1. Tumor ulceration<br>2. Mouse reaches limit points (CCPA) |                                      |
|        |                                 |                            | DIO-WT-ABT263   | 9  | 9                               |                                                             |                                      |
| 2C     | Tumor monitoring <i>in vivo</i> | B16-F10                    | DIO-WT-DMSO     | 5  | 5                               | 1. Tumor ulceration<br>2. Mouse reaches limit points (CCPA) |                                      |
|        |                                 |                            | DIO-WT-ABT263   | 5  | 5                               |                                                             |                                      |
| 2D     | Tumor monitoring <i>in vivo</i> | MC-38                      | DIO-WT-DMSO     | 5  | 5                               | 1. Tumor ulceration<br>2. Mouse reaches limit points (CCPA) |                                      |
|        |                                 |                            | DIO-WT-ABT263   | 5  | 5                               |                                                             |                                      |
| 3D-E   | Tumor monitoring <i>in vivo</i> | LLC <sup>LUC-mCherry</sup> | CTRL-WT-DMSO    | 6  | 6                               | 1. Tumor ulceration<br>2. Mouse reaches limit points (CCPA) |                                      |
|        |                                 |                            | CTRL-WT-ABT263  | 5  | 5                               |                                                             |                                      |
|        |                                 |                            | DIO-WT-DMSO     | 4  | 4                               |                                                             |                                      |

|       |                                    |                                 |                   |   |      |                                                                |
|-------|------------------------------------|---------------------------------|-------------------|---|------|----------------------------------------------------------------|
|       |                                    |                                 | DIO-WT-<br>ABT263 | 5 | 5    |                                                                |
| S3E-F | Tumor<br>monitoring <i>in vivo</i> | LLC <sup>LUC</sup> -<br>mCherry | CTRL-WT           | 5 | 6(1) | 1. Tumor ulceration<br>2. Mouse reaches<br>limit points (CCPA) |
|       |                                    |                                 | DIO-WT            | 7 | 7    |                                                                |

\*Numbers in red represent the number of excluded animals when applicable
